# Supplementary material for: Palivizumab Prophylaxis Against Respiratory Syncytial Virus Infection in Children with Immunocompromised Conditions or Down Syndrome: A Multicenter, Post-Marketing Surveillance in Japan
Source: PubMed Central journal article supplement — Paediatr Drugs. 2017 Sep 11;20(1):97–104. doi: 10.1007/s40272-017-0264-y (PMC5775975; doi:10.1007/s40272-017-0264-y), 2017-09-11
Supplement: 40272_2017_264_MOESM1_ESM.pdf [file 40272_2017_264_MOESM1_ESM.pdf]

**Journal:**

Pediatric Drugs

**Title:**

Safety and Effectiveness of Palivizumab Prophylaxis against Respiratory Syncytial Virus Infection in Children with Immunocompromised Conditions or Down Syndrome: A Multicenter, Post-Marketing Surveillance Study in Japan.

**Author names:**

Tomoko Kashiwagi, Yukiko Okada, and Ken Nomoto

**Author affiliations:**

AbbVie GK, Mita 3-5-27, Minato-ku, Tokyo, 108-6302, Japan

**Corresponding author:**

Ken Nomoto, AbbVie GK, Mita 3-5-27, Minato-ku, Tokyo, 108-6302, Japan.

E-mail: ken.nomoto@abbvie.com

Phone: +81-3-4577-1089

Fax: +81-3-4577-1020

## SUPPLEMENTARY TABLES

**Supplementary Table 1** Prior medications and concomitant drugs

| Prior Medications and Concomitant Drugs | n (%)      |
|-----------------------------------------|------------|
|                                         | [N = 304]  |
| Prior medication <sup>a,c</sup>         | 191 (62.8) |
| Adrenocortical steroids                 | 64 (21.1)  |
| Immunosuppressant                       | 61 (20.1)  |
| Antitumor drugs                         | 45 (14.8)  |
| Biologics                               | 1 (0.3)    |
| Unknown                                 | 1 (0.3)    |
| Others                                  | 188 (61.8) |
| Concomitant medications <sup>b,c</sup>  | 245 (80.6) |
| Others                                  | 240 (78.9) |
| Adrenocortical steroids                 | 85 (28.0)  |
| Immunosuppressant                       | 82 (27.0)  |
| Antitumor drugs                         | 61 (20.1)  |
| Biologics                               | 3 (1.0)    |
| Unknown                                 | 1 (0.3)    |

<sup>a</sup>Concomitant drug used during the period from 30 days to 1 day before the first administration

<sup>b</sup>Concomitant drug used during the period from first administration to 30 days after the final administration

<sup>c</sup>One subject may be counted more than once

**Supplementary Table 2** Adverse events (N=304)

|                                                         | Adverse events | Serious adverse events |
|---------------------------------------------------------|----------------|------------------------|
| Number of patients (events)                             | 99 (220)       | 53 (89)                |
| Incidence, %                                            | 32.56          | 17.43                  |
| Infections and infestations, n (%)                      | 56 (18.42)     | 29 (9.54)              |
| Pneumonia                                               | 7 (2.30)       | 6 (1.97)               |
| Bronchitis                                              | 6 (1.97)       | 3 (0.99)               |
| Gastroenteritis <sup>a</sup>                            | 6 (1.97)       | 3 (0.99)               |
| Influenza                                               | 5 (1.64)       | 2 (0.66)               |
| Respiratory syncytial virus infection <sup>b</sup>      | 4 (1.32)       | 2 (0.66)               |
| Bacteremia <sup>a</sup>                                 | 3 (0.99)       | 3 (0.99)               |
| Exanthema subitum                                       | 3 (0.99)       |                        |
| Conjunctivitis <sup>a</sup>                             | 3 (0.99)       |                        |
| Catheter site infection <sup>a</sup>                    | 3 (0.99)       |                        |
| Cytomegalovirus infection                               | 2 (0.66)       | 1 (0.33)               |
| Gastroenteritis viral                                   | 2 (0.66)       | 1 (0.33)               |
| Lower respiratory tract infection <sup>a</sup>          | 2 (0.66)       | 2 (0.66)               |
| Pneumonia bacterial                                     | 2 (0.66)       | 2 (0.66)               |
| Nasopharyngitis                                         | 2 (0.66)       |                        |
| Device related infection <sup>a</sup>                   | 2 (0.66)       | 1 (0.33)               |
| Croup infectious <sup>a</sup>                           | 1 (0.33)       |                        |
| Epstein-Barr virus infection                            | 1 (0.33)       | 1 (0.33)               |
| Infection <sup>a</sup>                                  | 1 (0.33)       | 1 (0.33)               |
| Peritonitis <sup>a</sup>                                | 1 (0.33)       | 1 (0.33)               |
| Cellulitis <sup>a</sup>                                 | 1 (0.33)       |                        |
| Pseudomembranous colitis <sup>a</sup>                   | 1 (0.33)       |                        |
| Sepsis <sup>a</sup>                                     | 1 (0.33)       | 1 (0.33)               |
| Septic shock <sup>a</sup>                               | 1 (0.33)       | 1 (0.33)               |
| Sinusitis <sup>a</sup>                                  | 1 (0.33)       |                        |
| Tonsillitis <sup>a</sup>                                | 1 (0.33)       | 1 (0.33)               |
| Upper respiratory tract infection                       | 1 (0.33)       |                        |
| Viral pharyngitis                                       | 1 (0.33)       |                        |
| Viral rash                                              | 1 (0.33)       |                        |
| Bronchitis viral                                        | 1 (0.33)       | 1 (0.33)               |
| Enteritis infectious <sup>a</sup>                       | 1 (0.33)       |                        |
| Clostridial infection <sup>a</sup>                      | 1 (0.33)       |                        |
| Enterocolitis viral                                     | 1 (0.33)       |                        |
| Viral rhinitis                                          | 1 (0.33)       |                        |
| Enterocolitis bacterial <sup>a</sup>                    | 1 (0.33)       |                        |
| Metapneumovirus infection                               | 1 (0.33)       |                        |
| Tinea manuum <sup>a</sup>                               | 1 (0.33)       |                        |
| Gastroenteritis norovirus                               | 1 (0.33)       |                        |
| Acute sinusitis <sup>a</sup>                            | 1 (0.33)       |                        |
| Respiratory, thoracic, and mediastinal disorders, n (%) | 36 (11.84)     | 9 (2.96)               |
| Upper respiratory tract                                 | 23 (7.57)      | 1 (0.33)               |

|                                                                    |                  |                 |
|--------------------------------------------------------------------|------------------|-----------------|
| inflammation                                                       |                  |                 |
| Asthma <sup>a</sup>                                                | 5 (1.64)         | 4 (1.32)        |
| Rhinorrhea                                                         | 2 (0.66)         |                 |
| Acute pulmonary edema <sup>a</sup>                                 | 1 (0.33)         | 1 (0.33)        |
| Cough                                                              | 1 (0.33)         |                 |
| Hypoxia <sup>a</sup>                                               | 1 (0.33)         | 1 (0.33)        |
| Interstitial lung disease <sup>a</sup>                             | 1 (0.33)         |                 |
| Pulmonary hypertension <sup>a</sup>                                | 1 (0.33)         | 1 (0.33)        |
| Respiratory arrest <sup>a</sup>                                    | 1 (0.33)         | 1 (0.33)        |
| Respiratory disorder <sup>a</sup>                                  | 1 (0.33)         | 1 (0.33)        |
| Respiratory failure <sup>a</sup>                                   | 1 (0.33)         | 1 (0.33)        |
| Allergic rhinitis <sup>a</sup>                                     | 1 (0.33)         |                 |
| Fibrinous bronchitis                                               | 1 (0.33)         |                 |
| <b>Blood and lymphatic system disorders, n (%)</b>                 | <b>16 (5.26)</b> | <b>8 (2.63)</b> |
| Febrile neutropenia                                                | 11 (3.62)        | 2 (0.66)        |
| Bone marrow failure <sup>a</sup>                                   | 3 (0.99)         | 3 (0.99)        |
| Anemia <sup>a</sup>                                                | 2 (0.66)         | 1 (0.33)        |
| Histiocytosis hematophagic <sup>a</sup>                            | 2 (0.66)         | 1 (0.33)        |
| Disseminated intravascular coagulation <sup>a</sup>                | 2 (0.66)         | 2 (0.66)        |
| Hemolysis <sup>a</sup>                                             | 1 (0.33)         | 1 (0.33)        |
| Pancytopenia <sup>a</sup>                                          | 1 (0.33)         | 1 (0.33)        |
| Coagulopathy <sup>a</sup>                                          | 1 (0.33)         | 1 (0.33)        |
| <b>Gastrointestinal disorders, n (%)</b>                           | <b>10 (3.29)</b> | <b>1 (0.33)</b> |
| Diarrhea                                                           | 6 (1.97)         |                 |
| Abdominal pain <sup>a</sup>                                        | 1 (0.33)         |                 |
| Ascites <sup>a</sup>                                               | 1 (0.33)         |                 |
| Constipation <sup>a</sup>                                          | 1 (0.33)         |                 |
| Enterocolitis <sup>a</sup>                                         | 1 (0.33)         |                 |
| Nausea <sup>a</sup>                                                | 1 (0.33)         |                 |
| Stomatitis <sup>a</sup>                                            | 1 (0.33)         |                 |
| Vomiting                                                           | 1 (0.33)         | 1 (0.33)        |
| <b>Hepatobiliary disorders, n (%)</b>                              | <b>9 (2.96)</b>  | <b>5 (1.64)</b> |
| Hepatic function abnormal <sup>a</sup>                             | 3 (0.99)         | 1 (0.33)        |
| Liver disorder <sup>a</sup>                                        | 3 (0.99)         | 1 (0.33)        |
| Cholangitis <sup>a</sup>                                           | 1 (0.33)         | 1 (0.33)        |
| Hepatic failure <sup>a</sup>                                       | 1 (0.33)         | 1 (0.33)        |
| Drug-induced liver injury <sup>a</sup>                             | 1 (0.33)         | 1 (0.33)        |
| <b>General disorders and administration site conditions, n (%)</b> | <b>8 (2.63)</b>  | <b>3 (0.99)</b> |
| Pyrexia                                                            | 6 (1.97)         | 2 (0.66)        |
| Condition aggravated <sup>a</sup>                                  | 1 (0.33)         | 1 (0.33)        |
| Pain                                                               | 1 (0.33)         |                 |
| <b>Investigations, n (%)</b>                                       | <b>8 (2.63)</b>  | <b>2 (0.66)</b> |
| Neutrophil count decreased                                         | 3 (0.99)         | 1 (0.33)        |
| Alanine aminotransferase increased                                 | 1 (0.33)         |                 |
| Blood culture positive <sup>a</sup>                                | 1 (0.33)         |                 |

|                                                                            |          |          |
|----------------------------------------------------------------------------|----------|----------|
| White blood cell count decreased                                           | 1 (0.33) |          |
| Antithrombin III decreased <sup>a</sup>                                    | 1 (0.33) |          |
| Norovirus test positive                                                    | 1 (0.33) | 1 (0.33) |
| Aspergillus test positive <sup>a</sup>                                     | 1 (0.33) |          |
| Immune system disorders, n (%)                                             | 6 (1.97) | 2 (0.66) |
| Hypogammaglobulinemia <sup>a</sup>                                         | 2 (0.66) |          |
| Chronic graft versus host disease <sup>a</sup>                             | 2 (0.66) | 2 (0.66) |
| Engraftment syndrome <sup>a</sup>                                          | 1 (0.33) |          |
| Graft versus host disease <sup>a</sup>                                     | 1 (0.33) |          |
| Hypersensitivity <sup>a</sup>                                              | 1 (0.33) |          |
| Metabolism and nutrition disorders, n (%)                                  | 5 (1.64) | 2 (0.66) |
| Hypoalbuminemia <sup>a</sup>                                               | 1 (0.33) | 1 (0.33) |
| Hypokalemia <sup>a</sup>                                                   | 1 (0.33) |          |
| Hyponatremia <sup>a</sup>                                                  | 1 (0.33) |          |
| Lactose intolerance <sup>a</sup>                                           | 1 (0.33) |          |
| Hypophagia <sup>a</sup>                                                    | 1 (0.33) | 1 (0.33) |
| Nervous system disorders                                                   | 4 (1.32) | 3 (0.99) |
| Febrile convulsion <sup>a</sup>                                            | 2 (0.66) | 2 (0.66) |
| Epilepsy <sup>a</sup>                                                      | 1 (0.33) |          |
| Neurological symptom <sup>a</sup>                                          | 1 (0.33) | 1 (0.33) |
| Injury, poisoning and procedural complications, n (%)                      | 4 (1.32) |          |
| Femur fracture <sup>a</sup>                                                | 1 (0.33) |          |
| Frostbite <sup>a</sup>                                                     | 1 (0.33) |          |
| Vaccination complication <sup>a</sup>                                      | 1 (0.33) |          |
| Postoperative ileus <sup>a</sup>                                           | 1 (0.33) |          |
| Skin and subcutaneous tissue disorders, n (%)                              | 4 (1.32) | 1 (0.33) |
| Rash                                                                       | 2 (0.66) | 1 (0.33) |
| Dermatitis <sup>a</sup>                                                    | 1 (0.33) |          |
| Penile ulceration <sup>a</sup>                                             | 1 (0.33) |          |
| Skin ulcer <sup>a</sup>                                                    | 1 (0.33) |          |
| Neoplasms benign, malignant and unspecified (incl cysts and polyps), n (%) | 3 (0.99) | 3 (0.99) |
| Brain neoplasm malignant <sup>a</sup>                                      | 1 (0.33) | 1 (0.33) |
| Nephroblastoma <sup>a</sup>                                                | 1 (0.33) | 1 (0.33) |
| Malignant neoplasm progression <sup>a</sup>                                | 1 (0.33) | 1 (0.33) |
| Cardiac disorders, n (%)                                                   | 3 (0.99) | 3 (0.99) |
| Cardiac failure <sup>a</sup>                                               | 2 (0.66) | 2 (0.66) |
| Bradycardia                                                                | 1 (0.33) | 1 (0.33) |
| Renal and urinary disorders, n (%)                                         | 3 (0.99) | 2 (0.66) |
| Renal impairment <sup>a</sup>                                              | 2 (0.66) | 2 (0.66) |
| Nephrotic syndrome <sup>a</sup>                                            | 1 (0.33) |          |
| Congenital, familial and genetic disorders, n (%)                          | 3 (0.99) | 3 (0.99) |
| Anal atresia <sup>a</sup>                                                  | 1 (0.33) | 1 (0.33) |
| X-linked lymphoproliferative syndrome <sup>a</sup>                         | 1 (0.33) | 1 (0.33) |
| Omenn syndrome <sup>a</sup>                                                | 1 (0.33) | 1 (0.33) |

|                                    |          |          |
|------------------------------------|----------|----------|
| Eye disorders, n (%)               | 2 (0.66) | 1 (0.33) |
| Eyelid edema <sup>a</sup>          | 1 (0.33) | 1 (0.33) |
| Uveitis <sup>a</sup>               | 1 (0.33) |          |
| Vascular disorders, n (%)          | 2 (0.66) | 1 (0.33) |
| Hypertension <sup>a</sup>          | 2 (0.66) | 1 (0.33) |
| Endocrine disorders, n (%)         | 2 (0.66) | 1 (0.33) |
| Adrenal disorder <sup>a</sup>      | 1 (0.33) | 1 (0.33) |
| Adrenal insufficiency <sup>a</sup> | 1 (0.33) |          |

<sup>a</sup>Adverse reactions/infections not expected based on PRECAUTIONS of the package insert

<sup>b</sup>In one case, RSV was detected on the day palivizumab was administered, and so it was not recorded as an AE. Hence only 4 RSV infections were recorded as AEs.

Adverse events were classified using Medical Dictionary for Regulatory Activities/Japanese Version 18.1.
